# Supplementary material
Source: MDPI journal article supplement (https://www.mdpi.com/1424-8247/17/4/442)
Supplement: s1 [file s1]

## Supplementary data

### **Comparative assessment of lignan profiling and biological activities of *Schisandra henryi* leaf and in vitro PlantForm bioreactor grown culture extracts**

Karolina Jaferník <sup>1</sup>, Paweł Kubica <sup>1</sup>, Michał Dziurka <sup>2</sup>, Łukasz Kulinowski <sup>3</sup>, Izabela Korona-Główniak <sup>4</sup>, Hosam O. Elansary <sup>5</sup>, Piotr Waligórski <sup>2</sup>, Krystyna Skalicka-Woźniak <sup>3</sup> and Agnieszka Szopa <sup>1,\*</sup>

<sup>1</sup> Department of Pharmaceutical Botany, Medical College, Jagiellonian University, Medyczna 9 str, 30-688 Kraków, Poland; karolina.jaferník@doctoral.uj.edu.pl (K.J.), p.kubica@uj.edu.pl (P.K.), a.szopa@uj.edu.pl (A.S.)

<sup>2</sup> Polish Academy of Sciences, The Franciszek Górski Institute of Plant Physiology, Niezapominajek 21 str, 30-239 Kraków, Poland; michał.dziurka@gmail.com (M.D.) p.waligorski@ifr-pan.edu.pl (P.W.)

<sup>3</sup> Department of Natural Products Chemistry, Medical University of Lublin, Chodźki 1 str, 20-093 Lublin, Poland; lukasz.kulinowski@umlub.pl (Ł.K), kskalicka@pharmacognosy.org (K.S.-W.)

<sup>4</sup> Department of Pharmaceutical Microbiology, Medical University of Lublin, 1 Chodźki str., 20-093 Lublin, Poland; iza.główniak@umlub.pl (IKG)

<sup>5</sup> Department of Plant Production, College of Food & Agriculture Sciences, King Saud University, P.O. Box 2460 str, Riyadh 11451, Saudi Arabia; helansary@ksu.edu.sa (H.O.E.)

\* Correspondence: a.szopa@uj.edu.pl (A.S.)

**Table S1.** Chemical structures of detected lignans in extracts in biomass of *S. henryi*

| Compound       | Chemical structure                                                                  | Transition     | Acquisition channel |
|----------------|-------------------------------------------------------------------------------------|----------------|---------------------|
| Wulignan A1    | 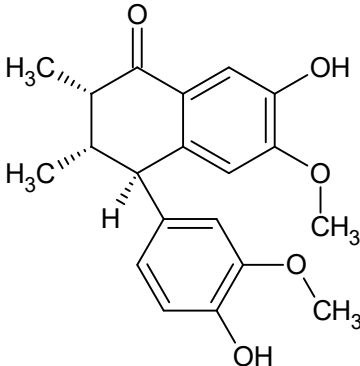  | 343.3 -> 117.0 | MRM                 |
| Rubrisandrin A |  | 369.3 -> 351.1 | MRM                 |

---

**Rubriflorin A**

557.4 -&gt; 173.0

MRM

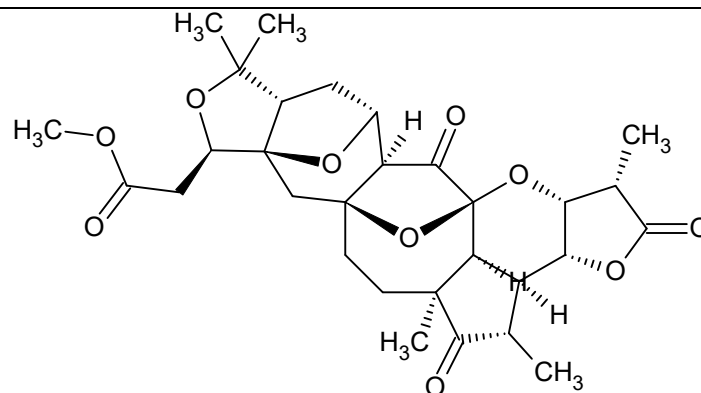

---

**Schisandrin**

415.3 -&gt; 359.2

MRM

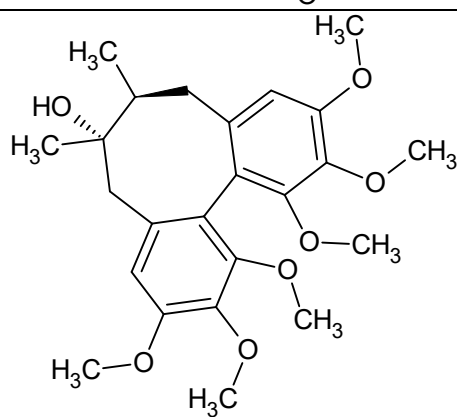

---

**Gomisin D**

401.3 -&gt; 168.0

MRM

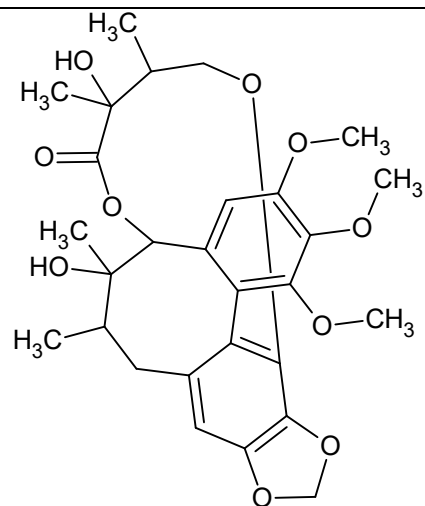

---

**Gomisin J**

389.3 -&gt; 117.0

MRM

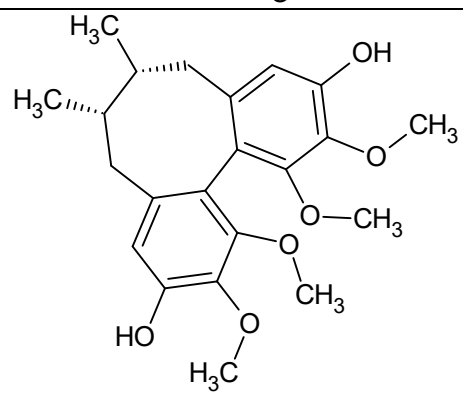



**Epigomisin O**

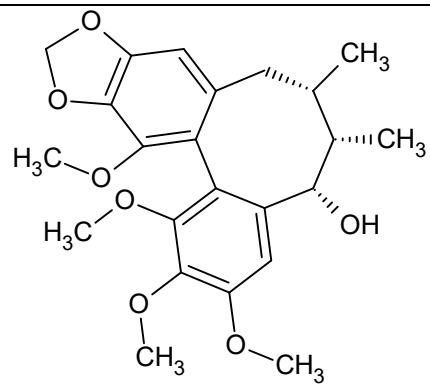

399.3 -> 368.2

MRM

**Gomisin O**

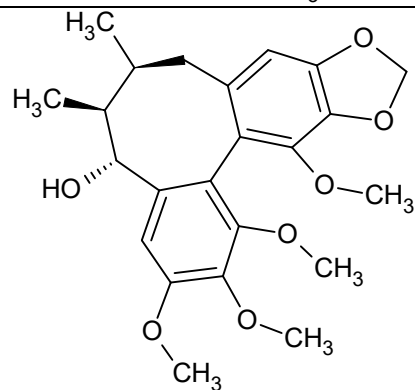

325.2 -> 152.0

MRM

|                 |                                                                                      |               |     |
|-----------------|--------------------------------------------------------------------------------------|---------------|-----|
| Schisantherin A | 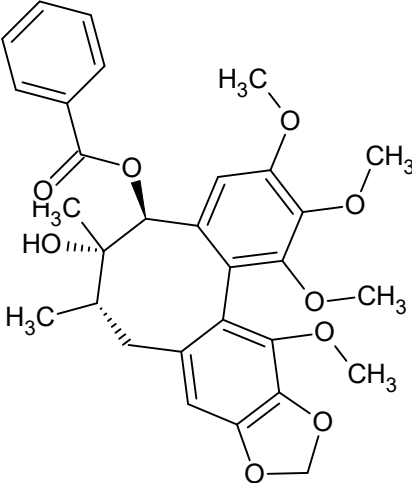   | 415.3 → 371.1 | MRM |
| Schisantherin B |   | 415.3 → 371.1 | MRM |
| Licarin A       |  | 327.3 → 105.1 | MRM |

---

**Schisanhenol**

403.3 -&gt; 231.0

MRM

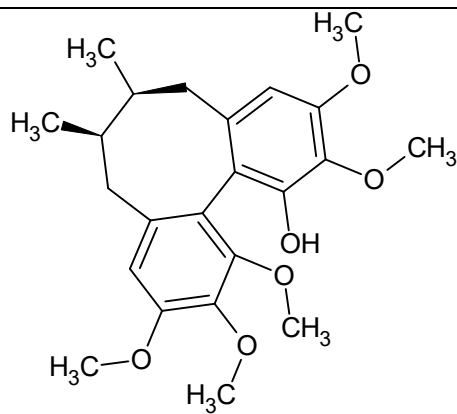

---

**Deoxyschisandrin**

417.3 -&gt; 316.2

MRM

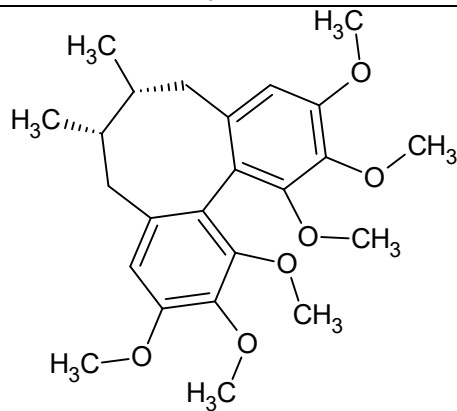

---

**Gomisin N**

401.3 -&gt; 168.0

MRM

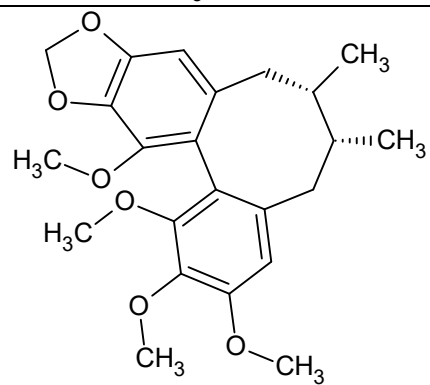



---

6-O-benzylgomisin O

399.3 -> 368.2

MRM

---

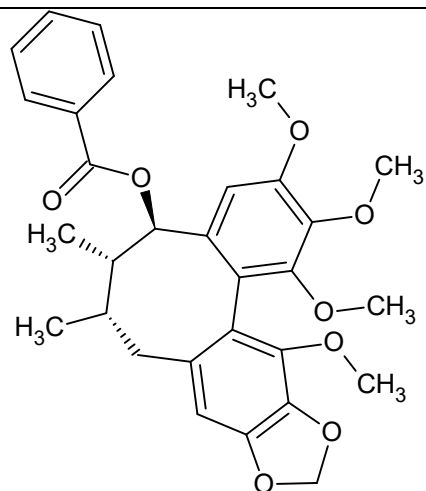

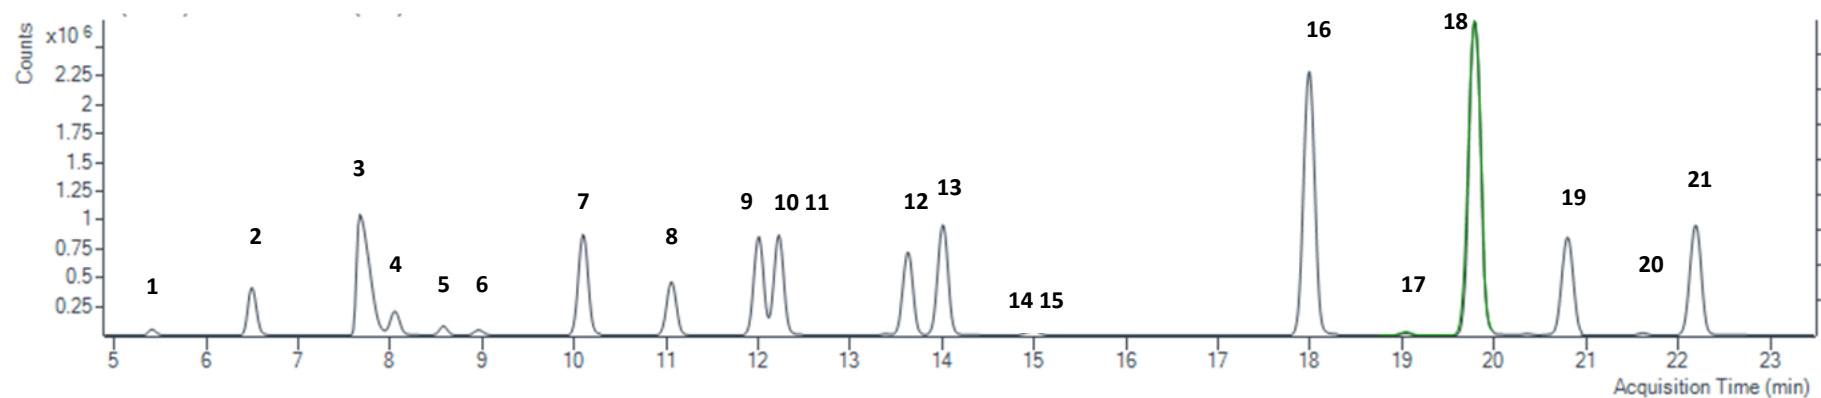

**Figure S1.** Exemplary TIC (total ion current) chromatogram of acquired MRM (multiple reaction monitoring) of lignan authentic standard mixture: 1 - wulignan A1; 2 - rubrisandrin A; 3 - rubriflorin A; 4 - schisandrin; 5 - gomisin D; 6 - gomisin J; 7- gomisin A; 8 - gomisin G; 9 - licarin B; 10 - epigomisin O; 11 - gomisin O; 12 - schisantherin A; 13 - schisantherin B; 14 - licarin A; 15 - schisanhenol; 16 - deoxyschisandrin; 17 - fragransin A; 18 - pregomisin; 19 - gomisin N; 20 - 6-O-benzylgomisin O; 21 - schisandrin C.
